# Supplementary material for: Glucocorticoids in preterm human milk
Source: PubMed Central journal article supplement (PMC9552215; doi:10.3389/fnut.2022.965654), 2022-09-27
Supplement: Data_Sheet_1.pdf [file Data_Sheet_1.pdf]

# Glucocorticoids in preterm human milk

## *Supplementary material*

**Muelbert Mariana<sup>1</sup>, Tanith Alexander<sup>1,2</sup>, Mark H. Vickers<sup>1</sup>, Jane E. Harding<sup>1</sup>, Laura Galante<sup>1</sup>, Frank H. Bloomfield<sup>1\*</sup> for the DIAMOND study group**

<sup>1</sup>Liggins Institute, University of Auckland, New Zealand

<sup>2</sup>Neonatal Unit, Kidz First, Middlemore Hospital, Auckland, New Zealand

**\* Correspondence:**

Frank H. Bloomfield

[f.bloomfield@auckland.ac.nz](mailto:f.bloomfield@auckland.ac.nz)

## Supplementary tables

**Supplementary Table 1** – Association between concentration of GCs in preterm HM and maternal characteristics.

|                                                                | <i>N (%)</i> | <i>Cortisol</i>  |                   | <i>Cortisone</i> |                   | <i>Cortisol-to-cortisone ratio</i> |                   |
|----------------------------------------------------------------|--------------|------------------|-------------------|------------------|-------------------|------------------------------------|-------------------|
|                                                                |              | <i>Mean (SE)</i> | <i>aMean (SE)</i> | <i>Mean (SE)</i> | <i>aMean (SE)</i> | <i>Mean (SE)</i>                   | <i>aMean (SE)</i> |
| <b>Pregnancy characteristics<sup>††</sup></b>                  | <b>n=170</b> |                  |                   |                  |                   |                                    |                   |
| Diabetes in pregnancy                                          |              |                  |                   |                  |                   |                                    |                   |
| No                                                             | 135 (79)     | 0.6 (0.4)        | 0.8 (0.04)        | 5.0 (0.3)        | 4.9 (0.3)         | 0.1 (0.01)                         | 0.1 (0.01)        |
| Yes                                                            | 35 (21)      | 0.6 (0.1)        | 0.8 (0.1)         | 4.5 (0.2)        | 4.9 (0.2)         | 0.1 (0.01)                         | 0.2 (0.01)        |
| <b>Maternal characteristics<sup>††</sup></b>                   | <b>n=170</b> |                  |                   |                  |                   |                                    |                   |
| Maternal age                                                   |              |                  |                   |                  |                   |                                    |                   |
| ≤30 years                                                      | 68 (40)      | 0.6 (0.1)        | 0.8 (0.1)         | 4.6 (0.3)        | 4.8 (0.3)         | 0.1 (0.01)                         | 0.2 (0.01)        |
| >30 years                                                      | 102 (60)     | 0.6 (0.04)       | 0.8 (0.04)        | 4.7 (0.2)        | 5.0 (0.2)         | 0.1 (0.01)                         | 0.1 (0.01)        |
| Ethnicity                                                      |              |                  |                   |                  |                   |                                    |                   |
| Caucasian                                                      | 66 (39)      | 0.7 (0.1)        | 0.8 (0.1)         | 5.0 (0.3)        | 5.3 (0.3)         | 0.1 (0.01)                         | 0.2 (0.01)        |
| Asian                                                          | 54 (32)      | 0.6 (0.1)        | 0.8 (0.1)         | 4.3 (0.3)        | 4.6 (0.3)         | 0.1 (0.01)                         | 0.2 (0.01)        |
| Māori                                                          | 20 (12)      | 0.5 (0.1)        | 0.6 (0.1)         | 4.9 (0.5)        | 4.7 (0.5)         | 0.1 (0.02)                         | 0.1 (0.02)        |
| Pasifika                                                       | 27 (15)      | 0.6 (0.1)        | 0.7 (0.1)         | 4.3 (0.4)        | 4.5 (0.4)         | 0.1 (0.05)                         | 0.2 (0.01)        |
| Other                                                          | 3 (2)        | 1.0 (0.3)        | 1.1 (0.2)         | 5.6 (1.2)        | 5.7 (1.2)         | 0.2 (0.05)                         | 0.2 (0.04)        |
| New Zealand Deprivation Index                                  |              |                  |                   |                  |                   |                                    |                   |
| Q1 (1,2)                                                       | 27 (16)      | 0.6 (0.1)        | 0.8 (0.1)         | 5.2 (0.4)        | 5.7 (0.4)         | 0.1 (0.06)                         | 0.1 (0.01)        |
| Q2 (3,4)                                                       | 39 (23)      | 0.7 (0.1)        | 0.9 (0.1)         | 4.9 (0.3)        | 5.2 (0.3)         | 0.2 (0.06)                         | 0.2 (0.01)        |
| Q3 (5,6)                                                       | 24 (14)      | 0.5 (0.1)        | 0.6 (0.1)         | 4.3 (0.5)        | 4.4 (0.4)         | 0.1 (0.06)                         | 0.1 (0.02)        |
| Q4 (7,8)                                                       | 30 (18)      | 0.7 (0.1)        | 0.8 (0.1)         | 4.3 (0.4)        | 4.5 (0.4)         | 0.2 (0.06)                         | 0.2 (0.01)        |
| Q5 (9,10)                                                      | 40 (29)      | 0.6 (0.1)        | 0.8 (0.1)         | 4.6 (0.3)        | 4.9 (0.3)         | 0.2 (0.06)                         | 0.2 (0.01)        |
| Education level                                                |              |                  |                   |                  |                   |                                    |                   |
| Secondary education or lower                                   | 51 (30)      | 0.6 (0.1)        | 0.8 (0.1)         | 4.5 (0.3)        | 4.7 (0.3)         | 0.1 (0.01)                         | 0.2 (0.01)        |
| Post-secondary education                                       | 30 (18)      | 0.7 (0.1)        | 0.8 (0.1)         | 4.7 (0.4)        | 4.9 (0.4)         | 0.1 (0.01)                         | 0.2 (0.01)        |
| Tertiary education (≥university)                               | 89 (52)      | 0.6 (0.05)       | 0.8 (0.05)        | 4.7 (0.2)        | 5.0 (0.2)         | 0.1 (0.01)                         | 0.1 (0.01)        |
| <b>Perceived stress<sup>1</sup> and depression<sup>2</sup></b> |              |                  |                   |                  |                   |                                    |                   |

## Glucocorticoids in preterm human milk

|                                                | <i>N (%)</i> | <i>Cortisol</i>  |                   | <i>Cortisone</i> |                   | <i>Cortisol-to-cortisone ratio</i> |                   |
|------------------------------------------------|--------------|------------------|-------------------|------------------|-------------------|------------------------------------|-------------------|
|                                                |              | <i>Mean (SE)</i> | <i>aMean (SE)</i> | <i>Mean (SE)</i> | <i>aMean (SE)</i> | <i>Mean (SE)</i>                   | <i>aMean (SE)</i> |
| Perceived stress (~day 10) <sup>††</sup>       | n=154        |                  |                   |                  |                   |                                    |                   |
| Low                                            | 56 (36)      | 0.6 (0.1)        | 0.7 (0.1)         | 4.9 (0.3)        | 5.0 (0.3)         | 0.1 (0.01)                         | 0.1 (0.01)        |
| Moderate                                       | 91 (59)      | 0.6 (0.05)       | 0.8 (0.05)        | 4.4 (0.2)        | 4.8 (0.2)         | 0.1 (0.01)                         | 0.2 (0.01)        |
| High                                           | 7 (5)        | 0.4 (0.2)        | 0.7 (0.2)         | 4.2 (0.8)        | 4.8 (0.8)         | 0.1 (0.03)                         | 0.1 (0.03)        |
| Perceived stress (follow-up) <sup>††</sup>     | n=147        |                  |                   |                  |                   |                                    |                   |
| Low                                            | 75 (51)      | 0.7 (0.6)        | 0.8 (0.1)         | 5.0 (0.2)        | 5.2 (0.3)         | 0.1 (0.05)                         | 0.1 (0.01)        |
| Moderate                                       | 69 (47)      | 0.6 (0.1)        | 0.8 (0.1)         | 4.3 (0.3)        | 4.5 (0.3)         | 0.1 (0.01)                         | 0.2 (0.01)        |
| High                                           | 3 (2)        | 0.5 (0.3)        | 0.6 (0.2)         | 4.6 (1.2)        | 5.0 (1.1)         | 0.1 (0.1)                          | 0.1 (0.04)        |
| Postnatal depression (~day 10) <sup>††</sup>   | n=153        |                  |                   |                  |                   |                                    |                   |
| No                                             | 105 (69)     | 0.6 (0.04)       | 0.8 (0.05)        | 4.6 (0.2)        | 5.0 (0.2)         | 0.1 (0.01)                         | 0.2 (0.01)        |
| Yes                                            | 48 (31)      | 0.6 (0.1)        | 0.8 (0.07)        | 4.4 (0.3)        | 4.7 (0.3)         | 0.1 (0.01)                         | 0.1 (0.01)        |
| Postnatal depression (follow-up) <sup>††</sup> | n=148        |                  |                   |                  |                   |                                    |                   |
| No                                             | 116 (78)     | 0.7 (0.05)       | 1.1 (0.1)         | 4.8 (0.2)        | 4.9 (0.2)         | 0.1 (0.01)                         | 0.1 (0.01)        |
| Yes                                            | 32 (22)      | 0.6 (0.1)        | 1.2 (0.2)         | 4.3 (0.4)        | 4.5 (0.4)         | 0.1 (0.01)                         | 0.2 (0.01)        |

Linear regression model mean estimates (ng/mL) and standard error (SE). Different superscript letters indicate groups significantly different. <sup>†</sup>adjusted for antenatal steroids course; <sup>§</sup> adjusted for lactation stage; <sup>††</sup>adjusted for lactation stage and antenatal steroids course. aMean: adjusted mean estimate; PN: postnatal age; Q: Quintiles of social deprivation; HM: human milk; BMI: body mass index. \*p<0.05; \*\*p<0.01; \*\*\*p<0.001.

<sup>1</sup>Perceived stress: Perceived Stress Scores (PSS) ranging from 0-13, 14-26 and 25-40 points were considered low, moderate and high perceived stress, respectively (Cohen et al., 1983).

<sup>2</sup>Perceived postnatal depression: Edinburgh Postnatal Depression Scale (EPDS) scores equal to 10 or above were considered indicative of postnatal depression (Cox et al., 1987; Wisner et al., 2002).

**Supplementary Table 2**– Association between glucocorticoid concentrations in preterm HM and infant characteristics.

|                                          | <i>N (%)</i>          | <i>Cortisol</i>  |                   | <i>Cortisone</i> |                   | <i>Cortisol-to-cortisone ratio</i> |                   |
|------------------------------------------|-----------------------|------------------|-------------------|------------------|-------------------|------------------------------------|-------------------|
|                                          |                       | <i>Mean (SE)</i> | <i>aMean (SE)</i> | <i>Mean (SE)</i> | <i>aMean (SE)</i> | <i>Mean (SE)</i>                   | <i>aMean (SE)</i> |
| <b>Birth size for gestational age</b>    |                       |                  |                   |                  |                   |                                    |                   |
| SGA                                      | 24 (12)               | 0.8 (0.1)        | 0.9 (0.1)         | 4.4 (0.4)        | 4.8 (0.5)         | 0.1 (0.02)                         | 0.2 (0.02)        |
| AGA                                      | 160 (84)              | 0.7 (0.04)       | 0.8 (0.05)        | 4.8 (0.2)        | 5.0 (0.2)         | 0.1 (0.01)                         | 0.2 (0.01)        |
| LGA                                      | 7 (4)                 | 0.7 (0.2)        | 0.7 (0.2)         | 4.5 (0.8)        | 4.6 (0.8)         | 0.1 (0.03)                         | 0.2 (0.03)        |
|                                          | <i>Median (range)</i> | <i>β (SE)</i>    | <i>aβ (SE)</i>    | <i>β (SE)</i>    | <i>aβ (SE)</i>    | <i>β (SE)</i>                      | <i>aβ (SE)</i>    |
| <b>Gestational age (weeks)</b>           | 33 (32-35)            | 0.1 (0.04)       | 0.04 (0.04)       | 0.3 (0.2)*       | 0.1 (0.2)         | 0.003 (0.01)                       | 0.001 (0.01)      |
| <b>Birth anthropometrics</b>             |                       |                  |                   |                  |                   |                                    |                   |
| Weight (z-score)                         | -0.05 (-2.6, 2.5)     | -0.03 (0.04)     | -0.1 (0.04)       | 0.2 (0.2)        | 0.03 (0.4)        | -0.001 (0.01)                      | -0.01 (0.01)      |
| Length (z-score)                         | 0.3 (-3.8, 3.2)       | -0.01 (0.04)     | -0.03 (0.04)      | 0.1 (0.1)        | 0.1 (0.1)         | 0.001 (0.01)                       | -0.001 (0.01)     |
| HC (z-score)                             | 0.4 (-2.0, 2.6)       | -0.05 (0.04)     | -0.1 (0.04)*      | 0.2 (0.2)        | 0.04 (0.2)        | -0.005 (0.01)                      | -0.01 (0.01)      |
| <b>In-hospital growth</b>                |                       |                  |                   |                  |                   |                                    |                   |
| Growth velocity (g/Kg.day)               | 7.7 (-19.3, 19.0)     | -0.03 (0.1)      | -0.004 (0.2)      | -0.02 (0.04)     | -0.02 (0.04)      | -0.01 (0.7)                        | 0.1 (1.0)         |
| Weight z-score change                    | -0.8 (-1.8, 0.5)      | -0.001 (0.1)     | 0.0003 (0.01)     | -0.001 (0.003)   | -0.001 (0.003)    | 0.002 (0.1)                        | 0.01 (0.1)        |
| Length z-score change                    | -0.4 (-2.5, 3.1)      | 0.01 (0.03)      | 0.01 (0.04)       | 0.002 (0.01)     | 0.002 (0.01)      | 0.02 (0.2)                         | 0.02 (0.2)        |
| HC z-score change                        | -0.4 (-2.2, 1.4)      | 0.004 (0.03)     | 0.02 (0.03)       | -0.004 (0.01)    | -0.002 (0.01)     | -0.01 (0.2)                        | 0.05 (0.2)        |
| <b>Birth to follow-up</b>                |                       |                  |                   |                  |                   |                                    |                   |
| Weight z-score change                    | -0.03 (-2.8, 2.1)     | -0.006 (0.04)    | 0.005 (0.04)      | 0.1 (0.3)        | -0.0001 (0.01)    | -0.05 (0.2)                        | 0.005 (0.2)       |
| Length z-score change                    | 0.3 (-2.8, 4.8)       | 0.005 (0.05)     | 0.02 (0.06)       | -0.002 (0.01)    | -0.002 (0.01)     | -0.06 (0.3)                        | -0.02 (0.3)       |
| HC z-score change                        | 0.3 (-2.1, 2.4)       | 0.0001 (0.003)   | 0.005 (0.03)      | 0.001 (0.01)     | 0.001 (0.01)      | -0.03 (0.1)                        | -0.02 (0.2)       |
| <b>Body composition (discharge)</b>      |                       |                  |                   |                  |                   |                                    |                   |
| Fat free mass (Kg)                       | 2.2 (1.6, 2.9)        | 0.004 (0.01)     | 0.001 (0.01)      | 0.002 (0.004)    | 0.001 (0.003)     | 0.02 (0.06)                        | 0.02 (0.1)        |
| Fat mass (Kg)                            | 0.2 (0.02, 0.6)       | -0.0004 (0.003)  | -0.0005 (0.003)   | -0.0003 (0.001)  | -0.0003 (0.001)   | 0.002 (0.01)                       | 0.002 (0.02)      |
| Fat mass index (Kg/m <sup>2</sup> )      | 1.2 (0.1, 2.3)        | -0.001 (0.01)    | -0.002 (0.01)     | -0.001 (0.002)   | -0.001 (0.003)    | 0.01 (0.05)                        | 0.005 (0.06)      |
| Fat free mass index (Kg/m <sup>2</sup> ) | 9.8 (8.0, 11.0)       | 0.01 (0.03)      | 0.01 (0.03)       | 0.01 (0.01)      | 0.004 (0.01)      | 0.01 (0.1)                         | 0.004 (0.2)       |
| <b>Body composition (follow-up)</b>      |                       |                  |                   |                  |                   |                                    |                   |
| Fat free mass (Kg)                       | 4.8 (3.7, 6.0)        | -0.002 (0.02)    | -0.003 (0.02)     | -0.0001 (0.001)  | -0.0005 (0.005)   | -0.01 (0.1)                        | -0.001 (0.1)      |
| Fat mass (Kg)                            | 1.7 (0.6, 3.2)        | -0.001 (0.01)    | -0.003 (0.01)     | -0.0001 (0.002)  | -0.0001 (0.002)   | -0.005 (0.04)                      | -0.01 (0.05)      |

## Glucocorticoids in preterm human milk

|                                          |                  |               |               |                 |                   |             |             |
|------------------------------------------|------------------|---------------|---------------|-----------------|-------------------|-------------|-------------|
| Fat mass index (Kg/m <sup>2</sup> )      | 4.1 (1.5, 7.3)   | -0.003 (0.02) | -0.005 (0.02) | -0.0004 (0.005) | -0.000001 (0.005) | -0.01 (0.1) | -0.02 (0.1) |
| Fat free mass index (Kg/m <sup>2</sup> ) | 11.9 (9.1, 14.0) | -0.005 (0.03) | -0.001 (0.04) | 0.0005 (0.01)   | 0.0003 (0.01)     | -0.02 (0.1) | 0.02 (0.2)  |

Linear regression model mean estimates or  $\beta$  coefficient (ng/mL) and standard error (SE). Model adjusted for sex, antenatal steroid course and lactation stage. aMean: adjusted mean estimate; AGA: appropriate for gestational age; LGA: large for gestational age; SGA: small for gestational age; HC: head circumference. \*p<0.05;
